# Supplementary material
Source: Research Square preprint supplement (doi:10.21203/rs.3.rs-9229347/v1)

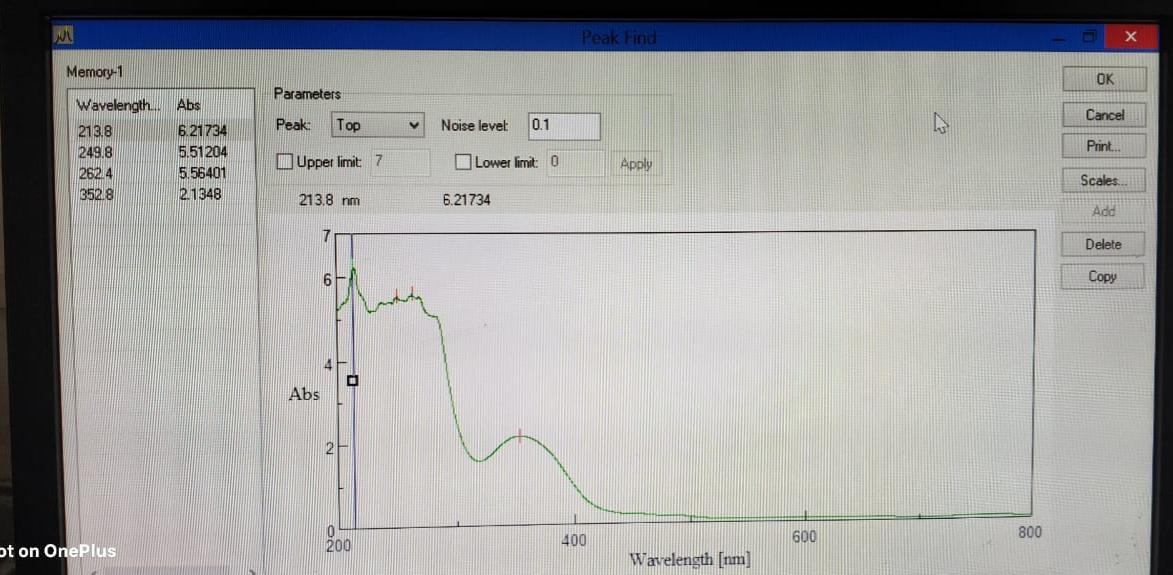

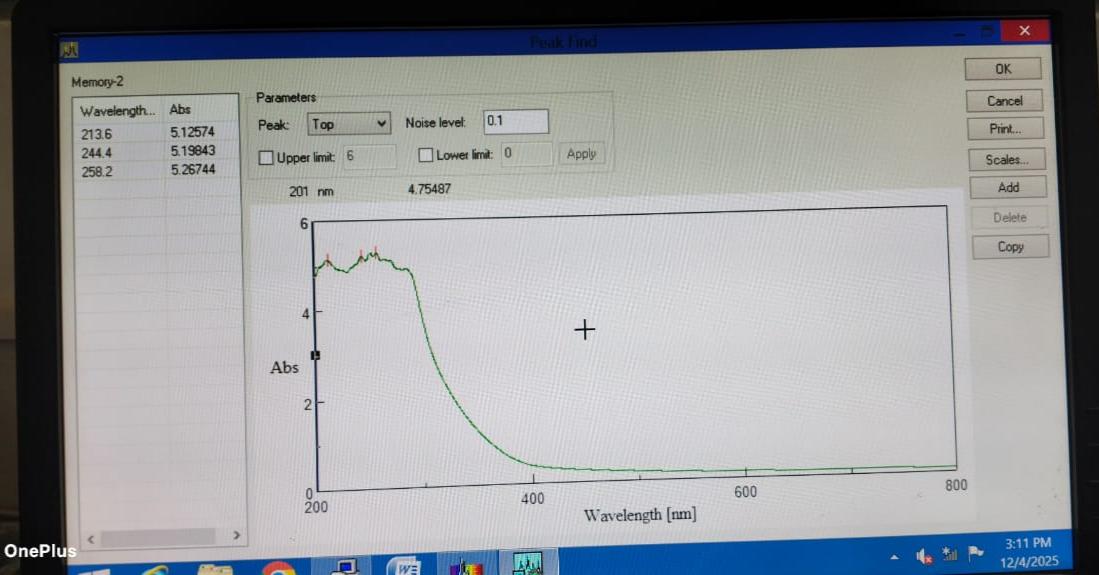
 (UV-Visible spectra for Yellow Marigold Flower Dye)

( UV-Visible spectra for Dried Walnut Shells Dye )

•
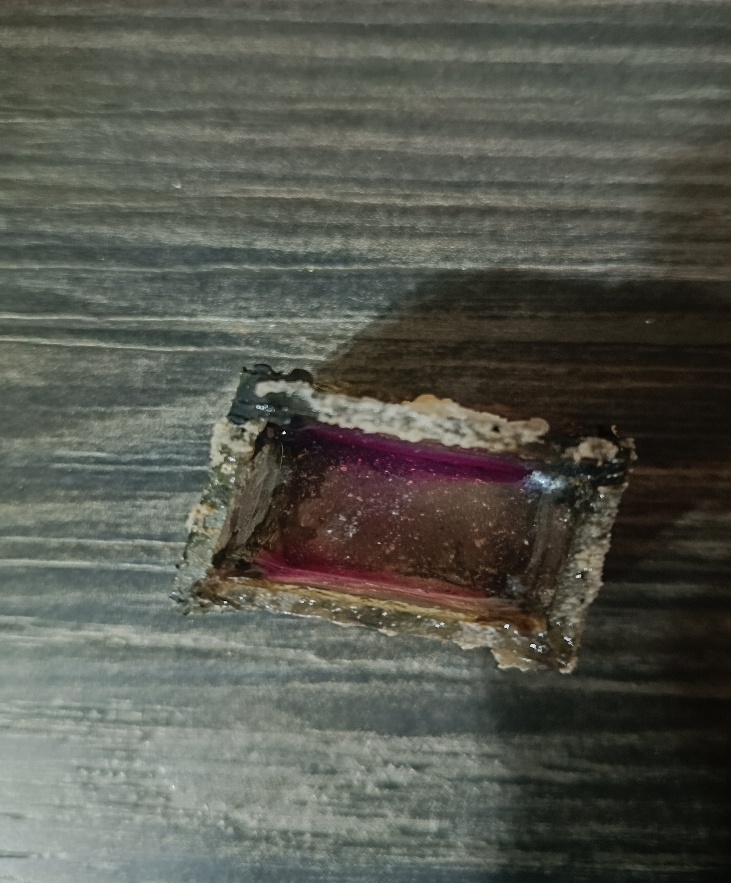

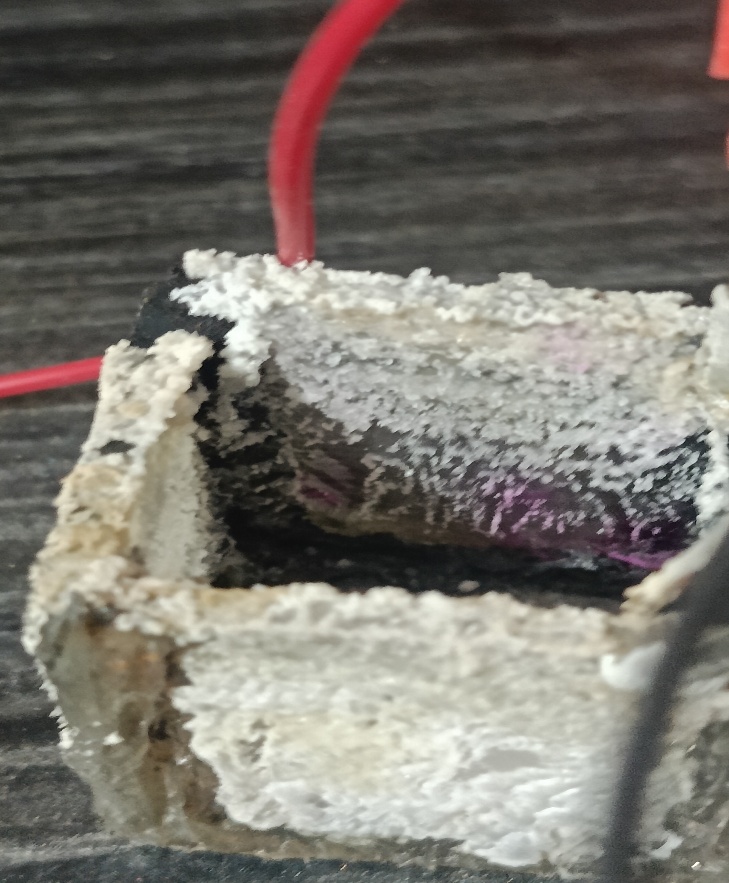

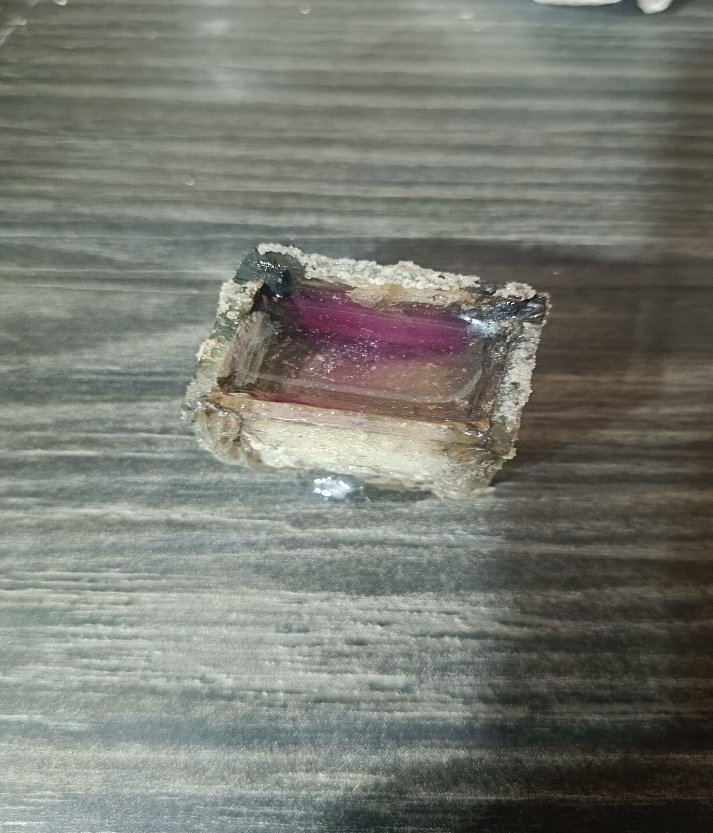

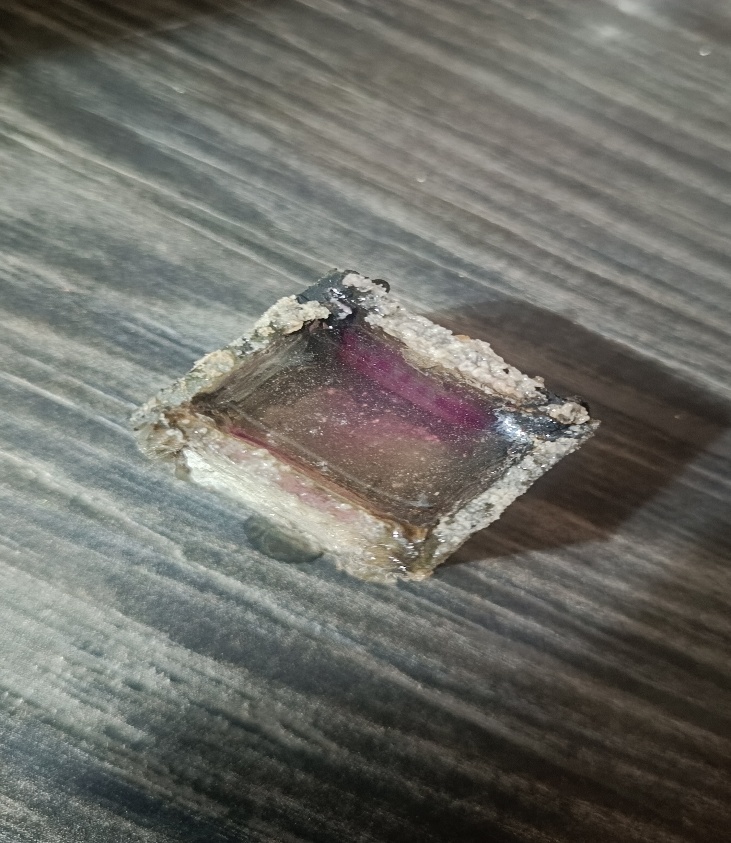
Sodium Hydroxide production at cathode in two Cuboidal-DSSC’s sensitized with Cocktail Dye (of yellow marigold flower petals dye and dried walnut shells dye in 1:1ratio) connected in series in Sunlight after 12 hours:-

-
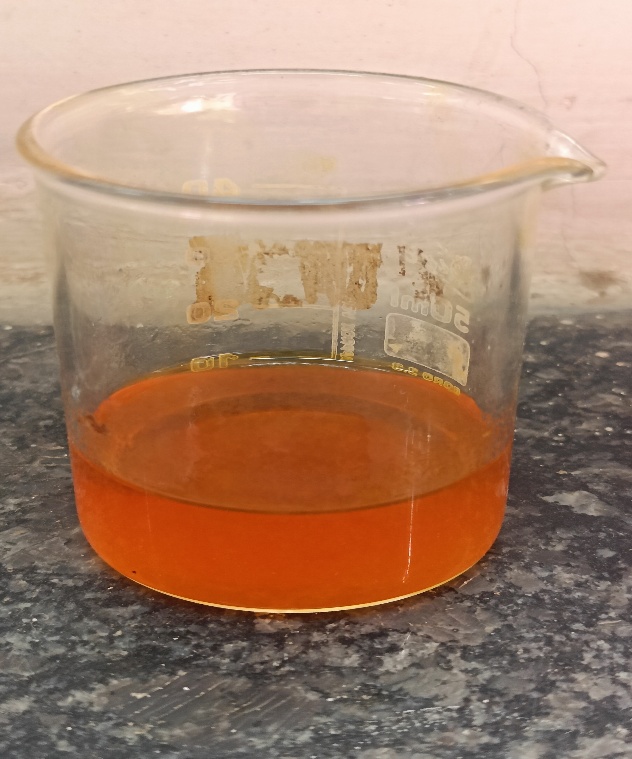
Yellow Marigold Flower Petals Dye :-
- Dried Walnut Shells Dye :-


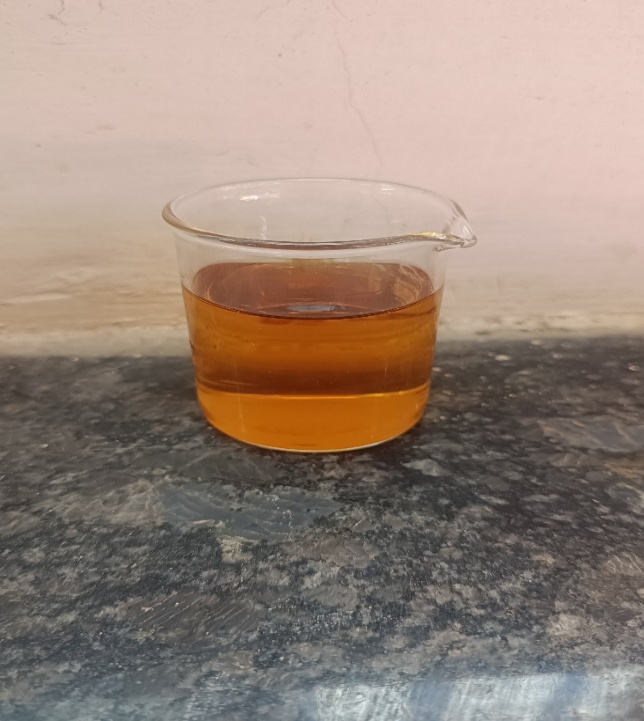


• Graphical Representation :-


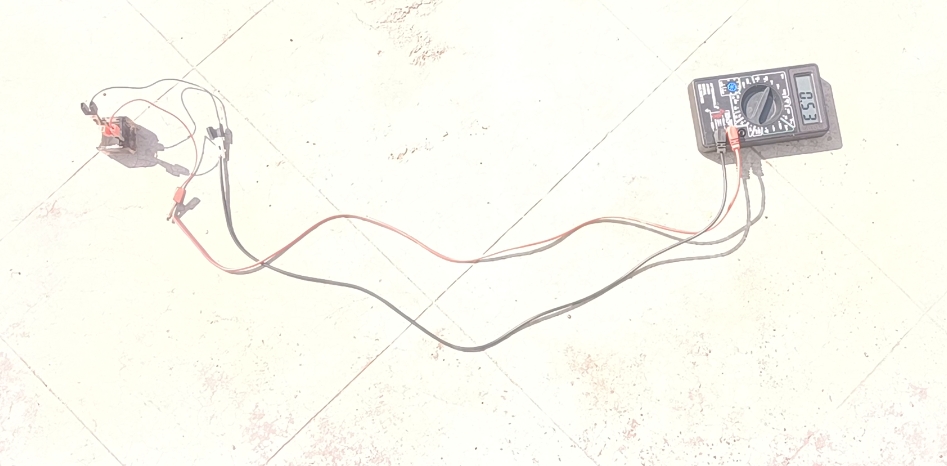
Open-circuit voltage [V(oc)] of Cuboidal-DSSC sensitized with Yellow Marigold Flower Dye in Sunlight :-


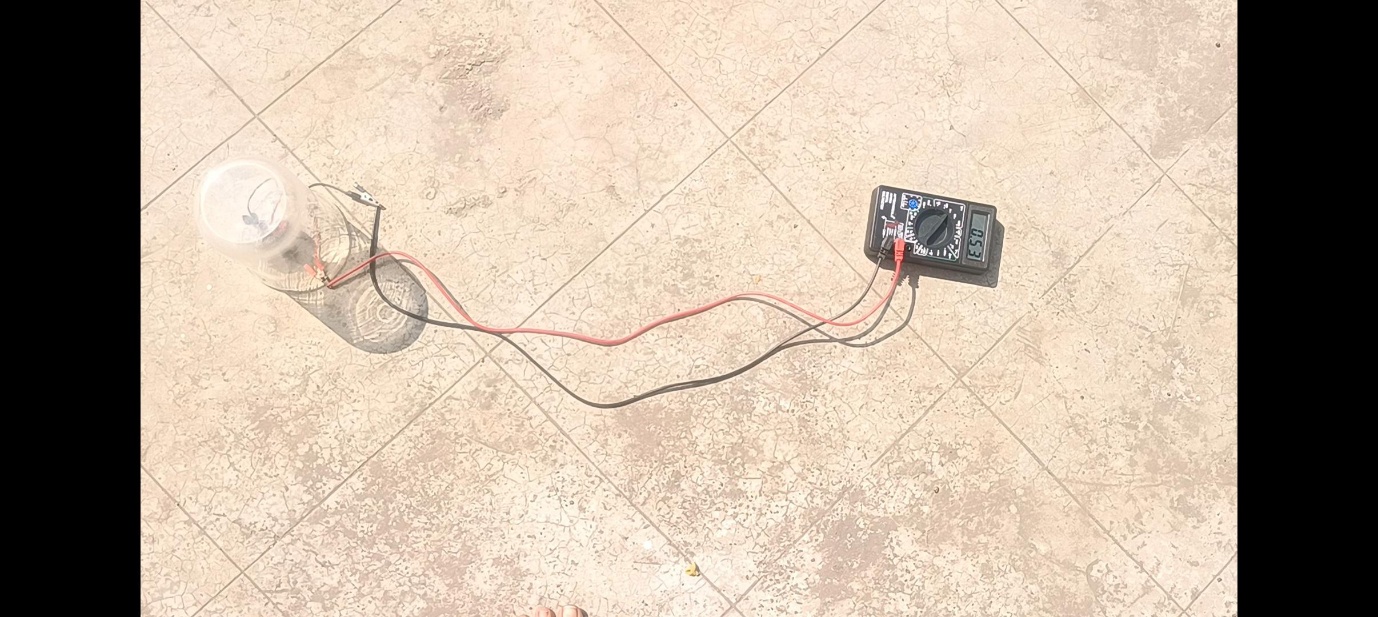
Open-circuit voltage [V(oc)] of Cuboidal-DSSC sensitized with Dried Walnut Shells Dye in Sunlight :-

Open-circuit voltage [V(oc)] of Cuboidal-DSSC sensitized with the Cocktail Dye (of Yellow Marigold Flower Dye and Dried Walnut Shells Dye in 1:1 ratio) in Sunlight :-


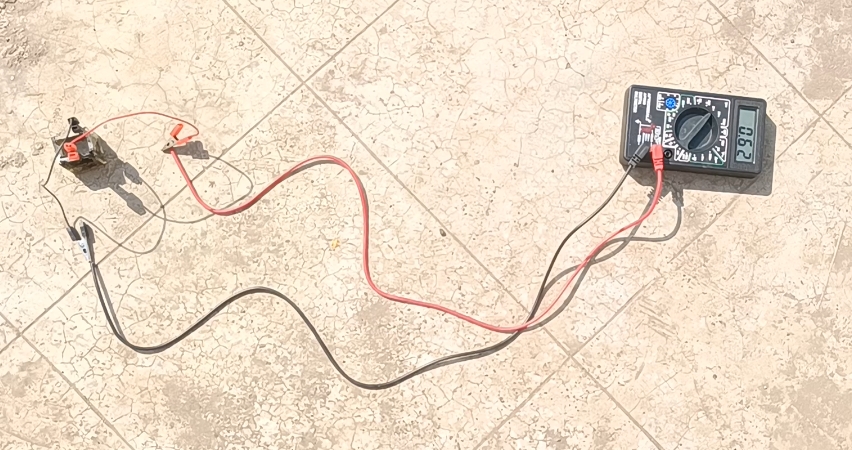

Supplement: Supplementary file 1 [file 353204508c2c3ad5a5a81967.docx]
